# Supplementary material
Source: Research Square preprint supplement (doi:10.21203/rs.3.rs-8819291/v1)
Supplement: Supplementary file 1 [file 44c30fa87d081e770b402158.xlsx]

## Sheet: Table 1. List for antibodies
Table. 1	List for antibodies
Antibody	Product number and company	Information with application
SREBP1	MABS1987, Millipore	WB 1:1000
pAKT(Ser473)	9271, Cell signaling	WB 1:1000
AKT	9272, Cell signaling	WB 1:1000
INSR	3025, Cell signaling	WB 1:1000
pFOXO1 (Ser276)	9461, Cell signaling	WB 1:1000
FOXO1	2880, Cell signaling	WB 1:1000
pCREB (Ser133)	9198, Cell signaling	WB 1:1000
CREB	9197, Cell signaling	WB 1:1000
pS6K	9205, Cell signaling	WB 1:1000
S6K	9202, Cell signaling	WB 1:1000
GAPDH	2118, Cell signaling	WB 1:1000
Anti-Rabbit-HRP	7074, Cell signaling	WB secondary antibody 1:3000
Anti-Mouse-HRP	7076, Cell signaling	WB secondary antibody 1:3000
Table. 2	List for primers
Target	Forward	Reverse
Htr2a	CGT GTC CAT GTT AAC CAT CCT	ACT GGG ATT GGC ATG GAT ATA C
Insr	CAA CTG TCC TGC CAC TGT CA	TTC AGC TGT GCA GCC ATG
Srebp1c	ATC GCA AAC AAG CTG ACC TG	AGA TCC AGG TTT GAG GTG GG
G6pc	GGT CCT GGA CAC CGA CTA CTA C	AAC ATA GTA TAC ACC TGC TGC GC
Pck1	GGG AAC TCA CTA CTC GGG AAG	GGT ATT TCT TCT TGC CTT CGG
Fbp1	TGC TGA AGT CGT CCT ACG C	TTC CGA TGG ACA CAA GGC
Acly	CCC TCT TCA GCC GAC ATA CC	CTG CTT GTG ATC CCC AGT GA
Acaca	CAG TAA CCT GGT GAA GCT GGA	GCC AGA CAT GCT GGA TCT CAT
Fasn	AAG CGG TCT GGA AAG CTG AA	AGG CTG GGT TGA TAC CTC CA
Scd1	AGA GTC AGG AGG GCA GGT TT	GAA CTG GAG ATC TCT TGG AGC A
36B4	GAG GAA TCA GAT GAG GAT ATG GGA	AAG CAG GCT GAC TTG GTT GC
